# Supplementary material
Source: Research Square preprint supplement (doi:10.21203/rs.3.rs-8405910/v1)
Supplement: Supplementary file 1 [file 3a997ff42b6a00f15ed2c3c7.docx]

# Supplementary Material

## In vitro cell-based assays assessing VES001

**Direct binding to human sortilin by Grating coupled interferometry (GCI):**

The direct *in vitro* binding properties of VES001 to recombinant human sortilin (Bio-Techne Ltd, 3154-ST-050) immobilized on a 4PCH chip (Creoptix AG) were determined by conducting GCI experiments using the Creoptix WAVEdelta equipment (Marlvern Phanalytical). The GCI assay involved three steps: 1) Chip conditioning and immobilisation – the preparation of the 4PCH GCI chip prior to sortilin immobilisation and the capturing of the progranulin upon the surface of a flow cell, 2) analyte screening – flowing VES001 over the immobilised sortilin upon the surface and a reference flow cell, and 3) data analysis – double referenced binding data (following blank and reference subtraction) to fit a 1:1 kinetic model to estimate the affinity and kinetics of the measured interaction.

*Chip conditioning and immobilization:* The 4PCH chip was conditioned across all flow cells using 0.2X concentration running buffer with the following composition: 1XHBS-N at pH 7.4 (Cytiva, BR-1006-70), 3.4 mM EDTA (Merck Life Science UK, E7889-100ML), and 1% DMSO (Sigma-Aldrich, D8418) using pre-set conditioning wizard (WAVE control software) injecting: 0.1 M borate (Xantec Bioanalytics, B BELU-50) and 1 M NaCl (pH 9) followed by three start-up injections of 0.2 X running buffer. All buffers described were filtered using a 0.2 µm filter (Nalgene, 10300461) and degassed for at least 15 minutes prior to use. A flow cell temperature of 25oC was used throughout the experiment. A buffer exchange was performed and 1x running buffer during the immobilisation procedure. An initial injection of a 1:1 solution of EDC and NHS (Cytiva, BR100050) was performed across all 4-flow cells to activate the surface for amine coupling of ligands (sortilin). The assay was designed such that each run included 4 separate flow cells, with one flow cell left blank to be used as a reference channel. Recombinant human sortilin was prepared ahead of the assay by reconstitution at a concentration of 100 µg/mL in sterile PBS and 50 µL aliquots flash frozen in 0.5 mL Eppendorf tubes on dry ice before storage at -80oC. For the assay, protein aliquots were thawed quickly by hand and centrifuged at 13300 rpm for 10 minutes. A 15 µg/mL protein solution was then made in pH 5.0 acetate (Cytiva, BR100351) and injected once for 20 minutes over non-blank flow-cells. A final 7-minute passivation injection of 50 mM tris (Merck Life Science UK, 93352-1KG) was used across all flow cells. A flow rate of 10 µl/min was used for all conditioning and immobilisation cycles.

*Analyte screening:* The assay was designed to measure the binding of compound VES001 to all immobilised proteins, using Creoptix Wave’s ‘RAPIDKinetics wizard’. A single batch of VES001 (NIDE002-058-1) was tested in 24 runs (N=24). For each run, VES001 was independently weighed twice and appropriate volumes of DMSO were added to make a final stock concentration of 10 mM. A compound was used throughout the experiment as a positive control to quantify surface activity, based on in-house experience. Compounds were screened at 1 µM using the in-built ‘intermediate binders’ settings: 100 uL/min, 45 s baseline, 25 s association, 300 s dissociation, with blanks every 5th sample and a DMSO correction (Running buffer containing 1.5 % DMSO) performed at the start and end of the experiment as well as every 20 cycles. An acquisition rate of 10 Hz and flow rate of 100 µl/min were used throughout the experiment. Both the control and VES001 were screened at a final assay concentration of 1 µM and a final DMSO concentration of 1 %. The compounds were diluted in DMSO from 100 or 10 mM stocks (for the control and VES001 respectively) to 100 µM (100 x final assay concentration) then diluted 1:100 in running buffer which contained no DMSO to establish a final assay concentration of compound of 1 µM and a final DMSO concentration of 1 %. Compounds and DMSO were mixed by plate shaking at 1000 rpm for 60 seconds using a Bioshake instrument. The reagents were added to the assay plate and experiment run.

*Data analysis:* All measurements made were double referenced (blank and reference flow-cell subtracted) before a 1:1 kinetic model was fit to the measured response. These steps were performed using the ‘Kinetic Analysis’ tool of the GCI ‘WAVEcontrol’ software (version 4.5.13) with data fitted using a standard 1:1 kinetic BioModel. The software was used to calculate the association rate constant (Kon), dissociation rate constant (Koff), and the equilibrium dissociation constant (KD) for each run, and the means and standard deviations were calculated across runs in Excel using the AVERAGE and STDEV.P functions.

**Direct binding to other human Vps10p members by GCI:**

The experiments were run as described for sortilin, but with other Vps10p family members immobilised instead: SorCS1 (Bio-Techne Ltd s, 3457-SR-050), SorCS2 (Bio-Techne Ltd s, 4238-SR-050), SorCS3 (Bio-Techne Ltd s, 3326-SR-050), and SorLA (Bio-Techne Ltd s, 9880-LA-050). The setups were validated by testing binding of ligands to the receptors prior to testing VES001. VES001 did not show any binding to SorCS1, SorCS2, SorCS3, nor SorLA, as shown with some examples in **Extended Data Figure 1.**


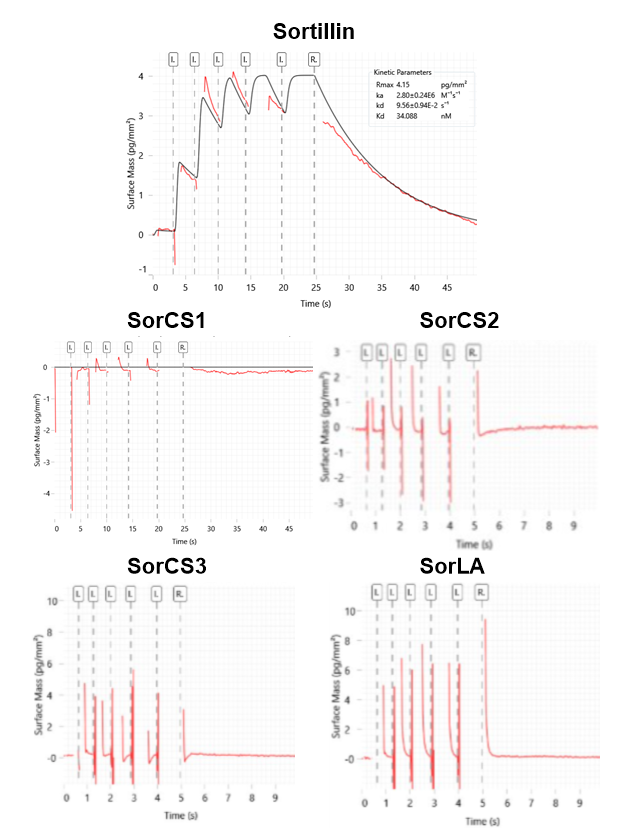


**Extended Data Figure 1** | **Examples of VES001 tested against sortilin, demonstrating binding, and other members of the Vps10p receptor family showing no binding.**

**Progranulin competition binding by a flowcytometry assay:**

The effect of VES001 on PGRN-sortilin binding was assessed using flow cytometry displacement assay in a HEK293-FL cell line with the assay protocol, data analysis and PGRN assay detailed below.

*Assay protocol*: the HEK293-FL stable cell line (HEK293 over expressing full length sortilin) was maintained in T175 cell culture flasks using culture media (DMEM + 10% FBS + 1% Penicillin/Streptomycin (100 units Penicillin, 100 µg/mL streptomycin final concentration) + 500 µg/mL Zeocin). When cells reached 80% confluency, they were either passaged for maintenance of cell line or harvested for use in screening assays. After harvesting, cells were counted using trypan blue and the Luna II cell counter. Cells were then passed through a cell strainer and added to all wells of the 384-well assay plate using the Certus liquid handler. Control or test compounds were then dispensed into the assay plate with test compounds dispensed in duplicate as 8-point half log concentration-response curves, with a top concentration of 30 µM, and DMSO normalised to 0.3%. The plate was then sealed, briefly vortexed and pulsed using the centrifuge, before incubating on ice for 1h. PGRN was custom-made with an N-terminal AVI-tag and biotinylated using BirA co-expression during biosynthesis, to ensure biotinylation in AVI-tag region only (6HIS-Avi-PGRN). This PGRN was prepared at 120 nM (4x concentrated) in assay buffer, with 10 µL then added to each well of the 384-well assay plate followed by incubation on ice for a further 1.5h. Streptavidin-AF647 was prepared at 1200 nM (4x concentrated) in assay buffer, with 10 µL then added to each well followed by a 0.5h incubation, The MACSQuantX was turned on to acquisition mode, and the lasers allowed to warm to 37°C. The machine was calibrated using calibration beads prior to sample acquisition. Following run completion, ‘.mqd’ data files were copied from the machine to the project folder for analysis.

*Data Analysis:* Screening data was analysed using FlowJo (X). The median (MFI) statistic was applied to the single cell gated population on the PGRN-AF647 channel, with the data for each individual sample then exported using the table editor to excel for analysis. Raw MFI data was normalised to the control compounds and loaded into Prism or Dotmatics for analysis using a 4-parameter curve fit (variable slope model) and IC50 values reported. Inhibitory constant (Ki) values were then determined using the Cheng-Prussoff equation: Ki = IC50 / [1 + (L/Kd). For the calculation L (ligand concentration) = 30 nM, and Kd = 28.8 nM (determined during assay validation). Z’-factor and assay window plate statistics were calculated using the high and low controls and used alongside a VES001-similar control IC50/Ki for passing screening plates. Pass criteria comprised of Z’>0.5, assay window > 2 and positive control IC50 within 3-fold of its expected value.

**Protein binding in human plasma by Rapid Equilibrium Dialysis (RED):**

*In vitro* plasma protein binding of VES001 to human plasma of mixed sex (BioIVT, lHMN646547) was determined using a rapid equilibrium dialysis (RED) method by LC-MS/MS. Three technical replicates (N=3) of 5 µM VES001 in mesylate salt form (batch NIDE002-058-1) and 1 µM of the control compound, Propranolol, were incubated in human plasma for 4 hours at 37oC. After incubation, aliquots of donor side matrixes were collected and diluted with an equal volume of the blank receiver side matrix. Aliquots of receiver side matrixes were diluted with an equal volume of blank donor side matrix. All samples were protein precipitated by addition of a two-fold volume of internal standard solution. The donor side volume was 200 µL, the receiver side volume was 350 µL, and the receiver side solution was 150 mM PBS at pH 7.4. The stock solution was 100-fold in DMSO. After centrifugation for 10 minutes at 13200 rpm with M-20 swinging bucket rotor, the supernatants were analysed with LC/MS/MS to obtain the unbound fraction of test substance in plasma. The recovery sample was prepared by pooling the remaining amounts of spiked donor side matrixes (replicates) together and preparing these for analysis in the same manner as donor side samples. The sample was prepared for analysis immediately after starting the RED experiment. The RED analysis was conducted using HPLC and MS equipment: Waters ACQUITY PREMIER UPLC, Waters TQ Absolute triple quadrupole MS, and the Waters Acquity BEH C18 (50 x 2.1mm, particle size 1.7 µm) with guard filter column. The polarity was ESI+, desolvation has flow of 900 L/h, cone gas of 200 L/h, capillary voltage of 1.2 kV, desolvation temperature of 650oC, and source temperature of 150oc. The first 0.5 minute of the run was directed into waste by using a divert valve to decrease the ion source contamination by early eluting early matrix constituents. The run includes a gradient elution of 0.1% formic acid in water and acetonitrile with an injection volume of 2 µL, with a constant flow of 0.5 mL/min, column oven temperature of 40oC. The gradient elution ran with a ratio of 0.1% formic acid in water to acetonitrile of 98:2 at 0.00 and 0.5 min, 35:65 at 2.5 min, 2:98 at 2.7 and 3.5 min, at finally 98:2 at 4.5 min. The VES001 MRM reactions were 306>117, 306>147, and 306>160 at collision energies of 28, 14, and 10, respectively. The polarity was ES+. The unbound fraction and recovery were calculated from the analyte peak areas (A) and the matrix volumes (V) as follows, as arithmetic means (AVERAGE) and standard deviations (STDEV):

**Sortilin downregulation assay:**

The impact of VES001 on cell surface and total sortilin protein levels was assessed *in vitro* in a flowcytometry assay in COLO792 cells. The cells were treated for 24h with a wide concentration range of VES001 (3, 9, 30, 90, 300, 900, 3000, and 9000 ng/mL). VES001 was tested alongside a sortilin-targeting antibody known to downregulate sortilin (1500 ng/mL), as a positive control.

*Cell culturing:* COLO792 cells (Merck, 93052616-1VL) were cultured in Roswell Park Memorial Institute (RPMI) medium (Gibco, 11875093) supplemented with 10% fetal bovine serum (FBS) (SLS, F9665-500 mL). On the day of the assay, cells were counted and seeded at a density of 50,000 cells per well in two 48-well plates, with a total volume of 500 µL per well. Plates were incubated at 37°C with 5% CO₂ for approximately 4 hours.

*Compound treatment:* All compound dilutions were done in culture media (RPMI + 10% FBS). The sortilin-targeting antibody Latozinemab Biosimilar (HY-P99688-1mg) was added approximately 4 hours after plating. To dispense the compound, a 1 in 100 stock solution was prepared and 6.4 µL was added to all high control wells.

*Fixation and permeabilization:* Media was removed using a multichannel pipette, and plates were rinsed with 500 µL of DPBS. After aspirating the DPBS, 200 µL of IC fixation buffer (Invitrogen, 00-8222-49) was added to all wells and incubated at room temperature for 30 minutes. Fixation buffer was then removed, and plates were rinsed twice with 500 µL DPBS. Permeabilization buffer (200 µL) (Invitrogen, 00-8333-56) was added to plate 2 only and incubated for 15 minutes at room temperature. All wells were then rinsed twice with 500 µL of DPBS.

*Staining:* Cells were stained with SORT1-CoraLite647 antibody (Proteintech, CL647-12369) at 2.5× the recommended concentration (1 µg per 1 × 10⁶ cells; stock: 1 mg/mL; supplier recommendation: 0.4 µg per 1 × 10⁶ cells). Given that the cells were seeded 24 hours prior, a maximum of 100,000 cells per well were assumed at the time of staining. Therefore, 0.1 µg of antibody was used per well in 200 µL volume. For staining, 20 mL of SORT1-CoraLite647 solution was prepared by adding 10 µL of antibody stock to 20 mL of DPBS + 0.5% BSA. The rabbit IgG isotype control (stock: 0.2 mg/mL) (Invitrogen, 51-4616-82) was prepared similarly in a total volume of 5 mL (12.5 µL in 5 mL DPBS + 0.5 % BSA). Plates were incubated at room temperature, protected from light (wrapped in aluminium foil), for 1 hour. After incubation, cells were rinsed twice with DPBS.

*Cell detachment*: TrypLE (200 µL) (Gibco, 12604021) was added to all wells. Plates were incubated at 37°C, 5% CO₂ and monitored under a microscope until cell detachment was observed (typically within 20–30 minutes). Once detachment occurred, TrypLE was inactivated by adding 100 µL of culture media containing FBS to every well. Cells were transferred to a 96-well V-bottom plates according to the plate map (Figure 3) using a multichannel pipette. Plates were centrifuged at 300 × g for 5 minutes. Using a Viaflow instrument, 150 µL of supernatant was carefully aspirated, leaving approximately 150 µL per well for flow cytometry analysis. Plates were stored at 4°C, wrapped in foil, until the flow cytometry experiment.

*Analysis*: The flow cytometer (MACSQuant X) was calibrated prior to the assay using calibration beads. Forward scatter (FSC) and side scatter (SSC) gain parameters were manually adjusted using 20 µL of sample. The assay was run using a gain of 450 for the APC channel. All raw data were first analysed using FlowJo software. Median fluorescence intensity (MFI) values and cell counts were exported as CSV files. Two batches of VES001 were each analysed in three runs. Within each run, the data was normalised with the isotype control set to 0% and the DMSO control set to 100%. The normalised data was then pooled across runs (N=6), and the arithmetic means and standard deviations were plotted in GraphPad Prism (version 10.1.1).

## In vivo microdialysis study on VES001 in rats

A microdialysis study was performed using 13 fasted male Sprague-Dawley rats (290 – 375 g; Charles River Laboratories, Germany). The experiments were conducted in strict accordance with the Guide for the Care and Use of Laboratory Animals (National Research Council 2011) and were in accordance with European Union directive 2010/63 and the Dutch law. The experiments were carried out under license number AVD23600202011187, issued by the national committee for licensing of animal experiments (Centrale Commissie Dierproeven) and were approved by the Animal Care and Use Committee (Instantie voor Dierenwelzijn) of Charles River Discovery Groningen. Following arrival, animals were housed in groups of up to 5 in polycarbonate cages (56X33X20 cm) with wire mesh top in a temperature (22 ± 2 °C) and humidity (55 ± 15%) controlled environment on a 12-hour light cycle (07.00 – 19.00h). After surgery, animals were housed individually (cages 30X30X30 cm). Standard diet (R/M-M A04 mod., Ssniff, Germany) and domestic quality mains water were available ad libitum.

The rats were divided into two treatment groups to receive either vehicle or VES001 and sampling probes were positioned by stereotaxic surgery (Kopf instruments, USA). All rats had guides and push-pull microdialysis probes with a 4 mm exposed polyethersulfone (PES 200) membrane (CRL Groningen, the Netherlands) positioned in the left hippocampus. For animals receiving VES001, guides and MetaQuant microdialysis probes with a 4 mm exposed ethylene vinyl alcohol (EC20) membrane (CRL Groningen, the Netherlands) were positioned in the right hippocampus. Coordinates for the tip of the probes were: AP = -5.3 mm (to bregma), lateral ±4.8 mm (to midline), ventral -8.0 mm (to dura). The incisor bar was set at -3.3 mm. All coordinates were based on “The rat brain in stereotaxic coordinates” by Paxinos and Watson (2009). The probes were attached to the skull with stainless steel screws and dental cement. The rats receiving VES001 were also equipped for CSF and blood sampling in the same surgical procedure. A stainless-steel cannula (CRL Groningen, the Netherlands) was positioned in the cisterna magna to allow for CSF sampling and an indwelling cannula (35 – 42 mm, CRL Groningen, the Netherlands) was positioned in the jugular vein and exteriorized through an incision on top of the skull to allow for blood sampling. The end of each cannula was fixed in position with dental cement and attached to the skull with stainless steel screws. Before surgery, Carprofen (5 mg/kg, s.c.) was administered for analgesia during surgery and the post-surgical recovery period. During surgery, animals were anesthetized using isoflurane (2.5 – 3.0% and 800 mL/min O2). A mixture of bupivacaine and epinephrine was used for local analgesia of the incision site and periosteum of the skull.

VES001 was formulated in 20% sulfobutylether-β-cyclodextrin (SBE-β-CD) in deionized water at a concentration of 20 mg/mL for oral gavage of 100 mg/kg in a volume of 5 mL/kg. All formulations were prepared fresh, and the doses were adjusted for the salt correction factors.

The *in vivo* PK/PD experiment was conducted one day after surgery, all rats received treatment by oral gavage at 0, 3, and 6 hours relative to the first oral dose. 6 rats received 0 mg/kg (vehicle), and 7 rats received 100 mg/kg of VES001 formulated in 20% SBE-β-CD. Food was removed at -2h and was returned after the third oral administration at 6h.

The probes were perfused with artificial CSF (aCSF: containing 147 mM NaCl, 3.0 mM KCl, 1.2 mM CaCl2 and 1.2 mM MgCl2) at a flow rate of 0.5 µL/min (push-pull probes) or with a slow flow of aCSF at a flow rate of 0.12 µL/min and a carrier flow of ultrapurified H2O at a flow rate of 0.8 µL/min (MetaQuant probes). After two hours of prestabilization, microdialysis samples were collected in 1-hour intervals, and each sample was set to the end of the sampling period. For example, three basal samples were collected from -3 to 0h, corresponding to samples at -2, 1, and 0h. Microdialysate samples were collected continuously for 12 hours after the first compound administration. Blood and CSF samples were taken at -2, 0, 1, 3, 4, 6, 7, 10, 12 h relative to the first oral dose. All samples were collected into 0.5 mL LoBind Eppendorf tubes. All samples were stored at -80 °C until analysis. The MetaQuant microdialysis probe achieved a mean and standard deviation relative *in vitro* recovery of VES001 at 69.8±3.40%. In contrast, the push-pull microdialysis probe demonstrated a previously established in vitro recovery of PGRN at 26.9 ±0.86%. The compound and PGRN levels were adjusted based on probe recovery. The compound levels of VES001 were quantified by High-performance liquid chromatography (HPLC) with tandem mass spectrometry (MS/MS) detection. For the quantification of rat PGRN, a commercially available ELISA kit was used according to the manufacturer’s guidelines (AdipoGen, AG-45A-0043YEK-KI01). Plasma samples were analyzed in duplicate. Samples that were outside the detection limits were re-analyzed on another plate in a more suitable dilution. In addition, samples of which the %CV of the duplicates was above 30% were re-analyzed on a different plate. Absorbance at 450 nm was measured using a Multiskan FC (ThermoFischer Scientific, USA). Data were processed using Microsoft Excel and plotted in Prism 9 for Windows, version 9.3.1 (GraphPad Software, Inc., 1992-2021).

### Human plasma and CSF VES001 analysis

VES001 was quantified in human plasma and CSF by protein precipitation and LC-MS/MS analysis. VES001 and an internal standard analog (dexamethasone) were isolated from 20µL CSF or plasma using protein precipitation. Calibration standards in the range from 1.00 to 5000 ng/mL used for method qualification were freshly prepared in human CSF or plasma on the day of analysis. For chromatographic separation, an Acquity UPLC column (Waters, HSS T3 1.8µm 2.1 X 50mm) was used with a flow rate of 0.6 mL/min, sample injection volume of 4 µL, and 4-minute gradient (1.5 min, B 65%, 1.6 min, B 100%, 2.6 min B, 30%). Mobile phases included Buffer A: 0.1% formic acid (FA) in ultra-pure water (UPW) and Buffer B: 0.1% FA 84% acetonitrile (ACN), 0.1% FA. This U-HPLC was coupled to a QTRAP6500+ tandem mass spectrometer equipped with a turbo ion spray probe in positive multiple reaction monitoring mode. Data acquisition was performed using Analyst software (version 1.7.2) from AB Sciex. Following peak area integration, regression was also performed using Analyst. Concentrations were calculated using 13-point curves with weighted linear regression, according to the following formula:

y = a + b * x * (weighting factor = 1/x2),

Where: x = VES001 concentration in ng/mL y = Peak-area ratio a = Intercept b = Slope.

The LLOQ for VES001 was 1.00 ng/mL and the ULOQ was 5000 ng/mL. The results were illustrated using GraphPad Prism (version 10.1.1).

Each analytical run incorporated duplicate quality control (QC) samples at three concentrations (Low, Medium, and High), which were prepared freshly in human CSF on the day of sample analysis or in bulk and stored at ≤ -18⁰C.

The acceptance criteria for the QC samples will be as follows:

- At least four of the six QC samples must be within ±15.0% of their respective nominal values (%bias).
- Two of the six QC samples may be outside ±15.0%, provided they are not at the same concentration.

The overall (mean) accuracy of the QC samples for all accepted runs should be within 85.0 – 115.0% of the theoretical value. In addition, the overall (mean) coefficient of variation (CV%) of the QC samples for all accepted runs must be ≤15.0%.

## Human plasma and CSF PGRN analysis

PGRN concentration was quantified in plasma and CSF using a previously developed Meso Scale Discovery (MSD)-based immunoassay as described in the main paper method section. Acceptance criteria for this are outlined below.

The Relative Light Unit (RLU) values were reported as a whole number, analyte concentrations to 3 decimals, % Theoretical, % Nominal, % CV, and %RE to 1 decimal.

The acceptance criteria for the individual samples (clinical samples, blank) were as follows:

- % CV of duplicates must not exceed 20%, except for the lower limit of quantitation (LLOQ) and the upper limit of quantitation (ULOQ) which must not exceed 25%
- %Theoretical must be between 100 ± 20% for each calibration standard, except for the LLOQ and the ULOQ which must be between 100 ± 25%
- Blank response must be lower than CS1 response

The sample analysis acceptance criteria was that the CV% of duplicates must not exceed 20% for unknown samples.

## Supplementary Results from VES001 in Ph1a Human Trials

### SAD Safety:

**Extended Data Table 1 | Treatment emergent adverse events in the single ascending dose study**

|  |  | **10mg VES001 (n=6)** | | | **30mg VES001 (n=6)** | | | **90mg VES001 fasted (n=6)** | | | **90mg VES001 fed (n=6)** | | | **270mg VES001 (n=6)** | | | **810mg VES001 (n=6)** | | | **990mg VES001 (n=6)** | | | **Placebo (n=12)** | | |
| --- | --- | --- | --- | --- | --- | --- | --- | --- | --- | --- | --- | --- | --- | --- | --- | --- | --- | --- | --- | --- | --- | --- | --- | --- | --- |
| **System Organ Class** | **Preferred Term** | **MILD** | **MOD** | **SEV** | **MILD** | **MOD** | **SEV** | **MILD** | **MOD** | **SEV** | **MILD** | **MOD** | **SEV** | **MILD** | **MOD** | **SEV** | **MILD** | **MOD** | **SEV** | **MILD** | **MOD** | **SEV** | **MILD** | **MOD** | **SEV** |
| ANY EVENTS |  | 2 | - | - | 2 | - | - | 3 | 2 | - | 3 | 1 | - | 3 | - | - | 4 | - | - | 4 | 1 | - | 5 | 1 | - |
| GASTRO-INTESTINAL DISORDERS | | - | - | - | 1 | - | - | 1 | - | - | 1 | - | - | - | - | - | 1 | - | - | - | - | - | - | - | - |
|  | Abdominal pain upper | - | - | - | - | - | - | - | - | - | - | - | - | - | - | - | 1 | - | - | - | - | - | - | - | - |
|  | Nausea | - | - | - | - | - | - | - | - | - | 1 | - | - | - | - | - | - | - | - | - | - | - | - | - | - |
|  | Toothache | - | - | - | 1 | - | - | - | - | - | - | - | - | - | - | - | - | - | - | - | - | - | - | - | - |
|  | Vomiting | - | - | - | - | - | - | 1 | - | - | - | - | - | - | - | - | - | - | - | - | - | - | - | - | - |
| GENERAL DISORDERS AND ADMINISTRATION SITE CONDITIONS | | - | - | - | - | - | - | - | - | - | - | - | - | - | - | - | - | - | - | 1 | - | - | 1 | - | - |
|  | Catheter site hemorrhage | - | - | - | - | - | - | - | - | - | - | - | - | - | - | - | - | - | - | 1 | - | - | - | - | - |
|  | Fatigue | - | - | - | - | - | - | - | - | - | - | - | - | - | - | - | - | - | - | - | - | - | 1 | - | - |
| INFECTIONS AND INFESTATIONS | | 1 | - | - | - | - | - | - | 1 | - | 1 | 1 | - | - | - | - | 1 | - | - | - | - | - | 2 | 1 | - |
|  | Infection | - | - | - | - | - | - | - | - | - | 1 | - | - | - | - | - | - | - | - | - | - | - | - | - | - |
|  | Nasopharyngitis | 1 | - | - | - | - | - | - | 1 | - | - | - | - | - | - | - | 1 | - | - | - | - | - | 1 | 1 | - |
|  | Pharyngitis | - | - | - | - | - | - | - | - | - | - | - | - | - | - | - | - | - | - | - | - | - | 1 | - | - |
|  | Tonsillitis | - | - | - | - | - | - | - | - | - | - | 1 | - | - | - | - | - | - | - | - | - | - | - | - | - |
| INJURY, POISONING AND PROCEDURAL COMPLICATIONS | | - | - | - | - | - | - | - | - | - | - | - | - | - | - | - | 2 | - | - | 2 | 1 | - | 1 | - | - |
|  | Animal bite | - | - | - | - | - | - | - | - | - | - | - | - | - | - | - | - | - | - | - | - | - | 1 | - | - |
|  | Post-lumbar puncture syndrome | - | - | - | - | - | - | - | - | - | - | - | - | - | - | - | 1 | - | - | 1 | 1 | - | - | - | - |
|  | Post procedural discomfort | - | - | - | - | - | - | - | - | - | - | - | - | - | - | - | 1 | - | - | - | - | - | - | - | - |
|  | Procedural pain | - | - | - | - | - | - | - | - | - | - | - | - | - | - | - | - | - | - | 1 | - | - | - | - | - |
| MUSCULOSKELETAL AND CONNECTIVE TISSUE DISORDERS | | 1 | - | - | - | - | - | - | - | - | - | - | - | - | - | - | - | - | - | 1 | - | - | - | - | - |
|  | Myalgia | 1 | - | - | - | - | - | - | - | - | - | - | - | - | - | - | - | - | - | 1 | - | - | - | - | - |

The number of study participants with treatment emergent adverse events by treatment, system organ class, preferred term and severity. MOD = Moderate, SEV = severe

### SAD PK data:

**Extended Data Table 2 | Pharmacokinetic parameters of the single ascending dose study**

| Treatment | Parameter | n | Mean | Geo Mean | s.d. | %CV | %Geo CV | Median | Min | Max |
| --- | --- | --- | --- | --- | --- | --- | --- | --- | --- | --- |
| 10 mg VES001 | AUClast (h*ng/mL) | 6 | 441.87 | 430.4 | 116.103 | 26.3 | 25 | 423.1 | 327.1 | 649.7 |
| Cmax (ng/mL) | 6 | 157.2 | 136.9 | 85.621 | 54.5 | 65.4 | 150 | 57.8 | 289 |
| tlag (h) | 6 |  |  |  |  |  | 0.25 | 0 | 0.75 |
| tmax (h) | 6 |  |  |  |  |  | 1.25 | 1 | 3.08 |
| 30 mg VES001 | AUCinf (h*ng/mL) | 4 | 1700.31 | 1664.61 | 406.124 | 23.9 | 24.1 | 1655.1 | 1274.7 | 2216.3 |
| AUClast (h*ng/mL) | 6 | 1515.88 | 1476.92 | 389.773 | 25.7 | 25 | 1402.4 | 1107.2 | 2150.5 |
| CL/F (L/h) | 4 | 18.4 | 18.02 | 4.295 | 23.3 | 24.1 | 18.3 | 13.5 | 23.5 |
| Cmax (ng/mL) | 6 | 378.67 | 371.25 | 82.786 | 21.9 | 22 | 363 | 273 | 506 |
| Vz/F (L) | 4 | 291.074 | 273.562 | 126.5036 | 43.5 | 40.9 | 250.71 | 187.43 | 475.44 |
| t1/2 (h) | 4 | 10.832 | 10.521 | 2.9743 | 27.5 | 28.6 | 10.76 | 7.81 | 14 |
| tlag (h) | 6 |  |  |  |  |  | 0.13 | 0 | 0.25 |
| tmax (h) | 6 |  |  |  |  |  | 1.5 | 0.5 | 4 |
| 90 mg VES001 fasted | AUCinf (h*ng/mL) | 3 | 3456.47 | 3453.87 | 162.639 | 4.7 | 4.8 | 3541.9 | 3268.9 | 3558.6 |
| AUClast (h*ng/mL) | 6 | 3829.95 | 3805.97 | 471.005 | 12.3 | 12.3 | 3779.2 | 3244.6 | 4498.4 |
| CL/F (L/h) | 3 | 26.08 | 26.06 | 1.261 | 4.8 | 4.8 | 25.4 | 25.3 | 27.5 |
| Cmax (ng/mL) | 6 | 908.17 | 892.09 | 192.942 | 21.2 | 20.7 | 849.5 | 724 | 1210 |
| Vz/F (L) | 3 | 291.365 | 284.013 | 75.5004 | 25.9 | 29.2 | 332.1 | 204.25 | 337.75 |
| t1/2 (h) | 3 | 7.724 | 7.555 | 1.89 | 24.5 | 26.9 | 8.36 | 5.6 | 9.21 |
| tlag (h) | 6 |  |  |  |  |  | 0.25 | 0.25 | 0.25 |
| tmax (h) | 6 |  |  |  |  |  | 1.5 | 1 | 4 |
| 90 mg VES001  fed | AUCinf (h*ng/mL) | 1 | 4981.96 | 4981.96 |  |  |  | 4982 | 4982 | 4982 |
| AUClast (h*ng/mL) | 6 | 4395.45 | 4338.09 | 763.459 | 17.4 | 18.1 | 4380.5 | 3244.6 | 5437.4 |
| CL/F (L/h) | 1 | 18.07 | 18.07 |  |  |  | 18.1 | 18.1 | 18.1 |
| Cmax (ng/mL) | 6 | 823.5 | 782.73 | 311.743 | 37.9 | 34.6 | 740 | 541 | 1410 |
| Vz/F (L) | 1 | 210.725 | 210.725 |  |  |  | 210.72 | 210.72 | 210.72 |
| t1/2 (h) | 1 | 8.085 | 8.085 |  |  |  | 8.09 | 8.09 | 8.09 |
| tlag (h) | 6 |  |  |  |  |  | 0.54 | 0.25 | 0.75 |
| tmax (h) | 6 |  |  |  |  |  | 4 | 3 | 6 |
| 270 mg VES001 | AUCinf (h*ng/mL) | 6 | 14477.31 | 14205.47 | 3267.474 | 22.6 | 21 | 13928.5 | 11533.6 | 20571.7 |
| AUClast (h*ng/mL) | 6 | 14143.37 | 13894.38 | 3084.281 | 21.8 | 20.3 | 13651.8 | 11263 | 19901.5 |
| CL/F (L/h) | 6 | 19.33 | 19.01 | 3.685 | 19.1 | 21 | 19.4 | 13.1 | 23.4 |
| Cmax (ng/mL) | 6 | 3030 | 2911.43 | 895.455 | 29.6 | 32.5 | 3135 | 1920 | 4060 |
| Vz/F (L) | 6 | 257.416 | 252.425 | 50.7261 | 19.7 | 23 | 277.43 | 163.39 | 300.25 |
| t1/2 (h) | 6 | 9.484 | 9.206 | 2.3635 | 24.9 | 28.4 | 9.56 | 5.58 | 12.62 |
| tlag (h) | 6 |  |  |  |  |  | 0.25 | 0 | 0.25 |
| tmax (h) | 6 |  |  |  |  |  | 1.5 | 0.75 | 3 |
| 810 mg VES001 | AUCinf (h*ng/mL) | 4 | 35056.71 | 34375.82 | 7440.084 | 21.2 | 24.1 | 37852.7 | 24289.4 | 40232.1 |
| AUClast (h*ng/mL) | 6 | 31903.36 | 30600.14 | 9063.113 | 28.4 | 34.3 | 36619.5 | 17306.3 | 38582.6 |
| CL/F (L/h) | 4 | 24.1 | 23.56 | 6.264 | 26 | 24.1 | 21.5 | 20.1 | 33.3 |
| Cmax (ng/mL) | 6 | 5890 | 5369.11 | 3099.406 | 52.6 | 47.2 | 5245 | 3160 | 11900 |
| Vz/F (L) | 4 | 297.097 | 293.283 | 55.3014 | 18.6 | 18.7 | 292.17 | 237.67 | 366.36 |
| t1/2 (h) | 4 | 8.73 | 8.627 | 1.5633 | 17.9 | 17.9 | 8.49 | 7.3 | 10.64 |
| tlag (h) | 6 |  |  |  |  |  | 0 | 0 | 0.25 |
| tmax (h) | 6 |  |  |  |  |  | 1.25 | 0.5 | 1.5 |
| 990 mg VES001 | AUCinf (h*ng/mL) | 5 | 44197.55 | 43691.89 | 7021.765 | 15.9 | 17.7 | 46492.7 | 32302.4 | 50849.6 |
| AUClast (h*ng/mL) | 6 | 42753.62 | 42354.29 | 6111.05 | 14.3 | 15.5 | 45056.6 | 32195.8 | 48537.7 |
| CL/F (L/h) | 5 | 22.96 | 22.66 | 4.408 | 19.2 | 17.7 | 21.3 | 19.5 | 30.6 |
| Cmax (ng/mL) | 6 | 8151.67 | 7991.38 | 1680.112 | 20.6 | 22.8 | 8550 | 5450 | 9880 |
| Vz/F (L) | 5 | 228.4 | 219.249 | 72.7199 | 31.8 | 33.1 | 215.03 | 138.76 | 338.42 |
| t1/2 (h) | 5 | 7.157 | 6.707 | 3.0266 | 42.3 | 41 | 6.69 | 4.52 | 12.05 |
| tlag (h) | 6 |  |  |  |  |  | 0 | 0 | 0.25 |
| tmax (h) | 6 |  |  |  |  |  | 1.5 | 1.5 | 3 |

Plasma PK parameters per treatment group. AUC = area under the curve, Cmax = the maximum plasma concentration, CL – clearance, CV = coefficient of variation; F = bioavailability, Geo = geometric; s.d. = standard deviation, t1/2 = half-life, tlag = lag time, tmax = time at which the maximum plasma concentration is reached, Vz = apparent volume of distribution.


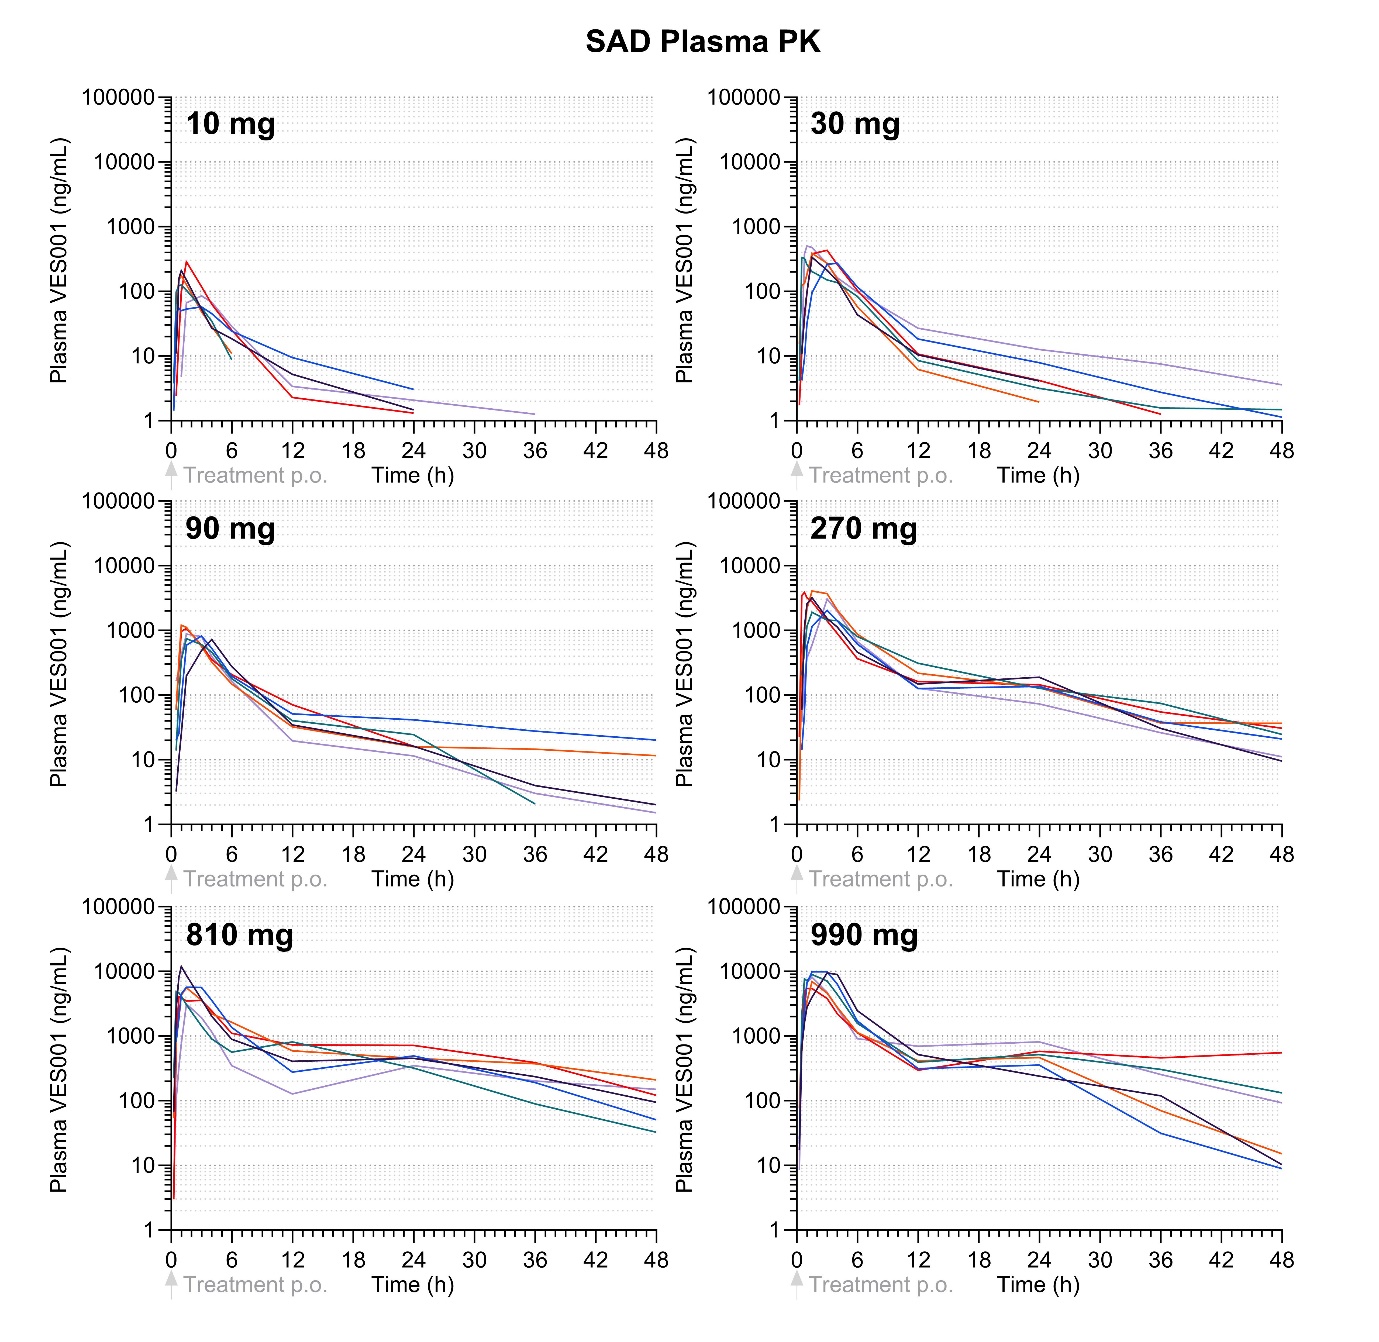


**Extended Data Figure 2** | **SAD Individual PK curves.** Individual pharmacokinetic curves in the single ascending dose study; h = hours, p.o. = per os.

### SAD Progranulin data:

**Extended Data Table 3** | **Plasma and cerebrospinal fluid progranulin data of the single ascending dose study**

| **Plasma Progranulin – Inferential statistics** | | | | | | | | |
| --- | --- | --- | --- | --- | --- | --- | --- | --- |
|  | | | | **Back transformed** | | | | |
| **Effect/Contrast** | | | **P-value** | **First LSM**  **of contrast** | **Second LSM**  **of contrast** | **Estimate of**  **the difference** | **Lower**  **95% CI** | **Upper 95% CI** |
| Baseline | | | <0.0001 |  | | | | |
| Treatment | | | <0.01 |
| Time | | | <0.0001 |
| Treatment by time | | | <0.05 |
| 10 mg VES001 vs. Placebo | | | 0.6062 | 115485.4 | 111802.3 | 3.3% | -8.9% | 17.2% |
| 30 mg VES001 vs. Placebo | | | 0.3570 | 105577.1 | 111802.3 | -5.6% | -16.6% | 6.9% |
| 90 mg VES001 vs. Placebo | | | 0.0993 | 124172.1 | 111802.3 | 11.1% | -2.1% | 25.9% |
| 270 mg VES001 vs. Placebo | | | 0.7573 | 109682.7 | 111802.3 | -1.9% | -13.4% | 11.1% |
| 810 mg VES001 vs. Placebo | | | <0.01 | 133640.2 | 111802.3 | 19.5% | 5.6% | 35.4% |
| 990 mg VES001 vs. Placebo | | | 0.0100 | 132829.0 | 111802.3 | 18.8% | 4.4% | 35.2% |
| **Plasma Progranulin – Descriptive statistics (Change from baseline)** | | | | | | | | |
|  |  | | **Back transformed** | | | | | |
| **Treatment** | | **Time** | **LSM** | **Lower  %95 CI** | **Upper  %95 CI** | **LSM change from baseline** | **Lower  95% CI** | **Upper  %95 CI** |
| Placebo | | Overall | 111802.3 | 104031.4 | 120153.6 | -1.5% | -8.3% | 5.9% |
| Day 1 1h | 116108.2 | 105919.7 | 127276.8 | 2.3% | -6.7% | 12.1% |
| Day 1 3h | 114191.4 | 104171.1 | 125175.7 | 0.6% | -8.2% | 10.3% |
| Day 1 6h | 106890.9 | 97511.2 | 117172.9 | -5.8% | -14.1% | 3.2% |
| Day 1 12h | 109759.2 | 100127.8 | 120317.1 | -3.3% | -11.8% | 6.0% |
| Day 1 24h | 108562.9 | 99036.4 | 119005.7 | -4.3% | -12.7% | 4.9% |
| Day 2 48h | 115649.4 | 105501.2 | 126773.9 | 1.9% | -7.0% | 11.7% |
| 10 mg VES001 | | Overall | 115485.4 | 103956.0 | 128293.5 | 1.8% | -8.4% | 13.0% |
| Day 1 1h | 112160.6 | 98242.0 | 128051.1 | -1.2% | -13.4% | 12.8% |
| Day 1 3h | 112752.6 | 98760.6 | 128727.0 | -0.7% | -13.0% | 13.4% |
| Day 1 6h | 116937.0 | 102425.7 | 133504.2 | 3.0% | -9.8% | 17.6% |
| Day 1 12h | 120963.8 | 105952.8 | 138101.5 | 6.6% | -6.6% | 21.7% |
| Day 1 24h | 111797.8 | 97924.3 | 127636.9 | -1.5% | -13.7% | 12.5% |
| Day 2 48h | 118619.2 | 103899.1 | 135424.7 | 4.5% | -8.5% | 19.3% |
| 30 mg VES001 | | Overall | 105577.1 | 95378.7 | 116866.0 | -7.0% | -16.0% | 3.0% |
| Day 1 1h | 98437.5 | 86467.5 | 112064.5 | -13.3% | -23.8% | -1.3% |
| Day 1 3h | 103111.8 | 90573.4 | 117386.0 | -9.1% | -20.2% | 3.4% |
| Day 1 6h | 115658.1 | 101594.0 | 131669.0 | 1.9% | -10.5% | 16.0% |
| Day 1 12h | 110661.9 | 97205.4 | 125981.2 | -2.5% | -14.4% | 11.0% |
| Day 1 24h | 103512.4 | 90925.3 | 117842.0 | -8.8% | -19.9% | 3.8% |
| Day 2 48h | 102987.4 | 90464.1 | 117244.3 | -9.3% | -20.3% | 3.3% |
| 90 mg VES001 | | Overall | 124172.1 | 112114.6 | 137526.4 | 9.4% | -1.2% | 21.2% |
| Day 1 1h | 118669.5 | 104193.2 | 135157.0 | 4.6% | -8.2% | 19.1% |
| Day 1 3h | 121359.7 | 106555.3 | 138221.1 | 6.9% | -6.1% | 21.8% |
| Day 1 6h | 127351.9 | 111816.5 | 145045.8 | 12.2% | -1.5% | 27.8% |
| Day 1 12h | 128113.8 | 112485.5 | 145913.5 | 12.9% | -0.9% | 28.6% |
| Day 1 24h | 124618.0 | 109416.1 | 141932.0 | 9.8% | -3.6% | 25.1% |
| Day 2 48h | 125183.9 | 109912.9 | 142576.5 | 10.3% | -3.2% | 25.6% |
| 270 mg VES001 | | Overall | 109682.7 | 99052.3 | 121454.0 | -3.4% | -12.7% | 7.0% |
| Day 1 1h | 100472.0 | 88229.7 | 114412.9 | -11.5% | -22.3% | 0.8% |
| Day 1 3h | 99280.8 | 87183.7 | 113056.5 | -12.5% | -23.2% | -0.4% |
| Day 1 6h | 101972.7 | 89547.6 | 116121.9 | -10.2% | -21.1% | 2.3% |
| Day 1 12h | 120167.7 | 105525.6 | 136841.5 | 5.9% | -7.0% | 20.6% |
| Day 1 24h | 112990.6 | 99223.0 | 128668.5 | -0.4% | -12.6% | 13.4% |
| Day 2 48h | 126068.0 | 110707.0 | 143560.5 | 11.1% | -2.5% | 26.5% |
| 810 mg VES001 | | Overall | 133640.2 | 120681.8 | 147990.1 | 17.8% | 6.3% | 30.4% |
| Day 1 1h | 114258.6 | 100332.6 | 130117.6 | 0.7% | -11.6% | 14.6% |
| Day 1 3h | 122253.4 | 107353.0 | 139222.1 | 7.7% | -5.4% | 22.7% |
| Day 1 6h | 132319.4 | 116192.1 | 150685.3 | 16.6% | 2.4% | 32.8% |
| Day 1 12h | 145339.7 | 127625.4 | 165512.7 | 28.1% | 12.5% | 45.8% |
| Day 1 24h | 150540.9 | 132192.7 | 171435.9 | 32.6% | 16.5% | 51.1% |
| Day 2 48h | 140867.3 | 123698.1 | 160419.6 | 24.1% | 9.0% | 41.3% |
| 990 mg VES001 | | Overall | 132829.0 | 119567.6 | 147561.3 | 17.0% | 5.4% | 30.0% |
| Day 1 1h | 117703.5 | 103118.1 | 134351.8 | 3.7% | -9.1% | 18.4% |
| Day 1 3h | 121415.6 | 105627.4 | 139563.8 | 7.0% | -6.9% | 23.0% |
| Day 1 6h | 140579.9 | 123159.8 | 160463.9 | 23.9% | 8.5% | 41.4% |
| Day 1 12h | 136359.1 | 119462.0 | 155646.1 | 20.1% | 5.3% | 37.1% |
| Day 1 24h | 137529.8 | 120487.7 | 156982.4 | 21.2% | 6.2% | 38.3% |
| Day 2 48h | 145777.5 | 127713.4 | 166396.7 | 28.4% | 12.5% | 46.6% |
| **Cerebrospinal fluid progranulin – Inferential statistics** | | | | | | | | |
|  | | | | **Back transformed** | | | | |
| **Effect/Contrast** | | | **P-value** | **First LSM**  **of contrast** | **Second LSM**  **of contrast** | **Estimate of**  **the difference** | **Lower**  **95% CI** | **Upper 95% CI** |
| Baseline | | | <0.0001 |  | | | | |
| Treatment | | | 0.5091 |
| 810 mg VES001 vs. Placebo | | | 0.7080 | 3020.704 | 2956.392 | 2.2% | -9.6% | 15.5% |
| 990 mg VES001 vs. Placebo | | | 0.2773 | 3166.474 | 2956.392 | 7.1% | -6.1% | 22.1% |

CI = Confidence interval; CSF = cerebrospinal fluid; h = hours; LSM = Least square means; PGRN = Progranulin; SAD = single-ascending dose

### MAD safety:

**Table 4 Treatment | Treatment emergent adverse events in the single ascending dose study**

|  |  | **180 mg VES001**  **once daily**  **(n = 8)** | | | **180 mg VES001**  **twice daily**  **(n = 9)** | | | **450 mg VES001**  **twice daily**  **(n = 8)** | | | | **Placebo**  **(n = 6)** | | | |
| --- | --- | --- | --- | --- | --- | --- | --- | --- | --- | --- | --- | --- | --- | --- | --- |
| **System Organ Class** | **Preferred Term** | **MILD** | **MOD** | **SEV** | **MILD** | **MOD** | **SEV** | | **MILD** | **MOD** | **SEV** | | **MILD** | **MOD** | **SEV** |
| ANY EVENTS |  | 8 | - | - | 7 | 1 | - | | 7 | - | - | | 3 | - | - |
| CARDIAC DISORDERS | | - | - | - | 1 | - | - | | - | - | - | | - | - | - |
|  | Palpitations | - | - | - | 1 | - | - | | - | - | - | | - | - | - |
| EYE DISORDERS | | - | - | - | - | - | - | | 1 | - | - | | - | - | - |
|  | Ocular discomfort | - | - | - | - | - | - | | 1 | - | - | | - | - | - |
| GASTROINTESTINAL DISORDERS | | 3 | - | - | 4 | - | - | | 1 | - | - | | - | - | - |
|  | Aphthous ulcer | 1 | - | - | - | - | - | | - | - | - | | - | - | - |
|  | Diarrhoea | - | - | - | - | - | - | | 1 | - | - | | - | - | - |
|  | Flatulence | - | - | - | 2 | - | - | | - | - | - | | - | - | - |
|  | Gastrooesophageal reflux disease | - | - | - | 1 | - | - | | - | - | - | | - | - | - |
|  | Mouth ulceration | 1 | - | - | - | - | - | | - | - | - | | - | - | - |
|  | Nausea | 1 | - | - | 1 | - | - | | - | - | - | | - | - | - |
| GENERAL DISORDERS AND ADMINISTRATION SITE CONDITIONS | | 4 | - | - | 2 | - | - | | 4 | - | - | | 1 | - | - |
|  | Fatigue | 4 | - | - | 2 | - | - | | 4 | - | - | | 1 | - | - |
|  | Feeling jittery | - | - | - | - | - | - | | - | - | - | | 1 | - | - |
| IMMUNE SYSTEM DISORDERS | | 1 | - | - | - | - | - | | - | - | - | | - | - | - |
|  | Seasonal allergy | 1 | - | - | - | - | - | | - | - | - | | - | - | - |
| INFECTIONS AND INFESTATIONS | | 1 | - | - | - | - | - | | 1 | - | - | | - | - | - |
|  | Nasopharyngitis | 1 | - | - | - | - | - | | - | - | - | | - | - | - |
|  | Upper respiratory tract infection | - | - | - | - | - | - | | 1 | - | - | | - | - | - |
| INJURY, POISONING AND PROCEDURAL COMPLICATIONS | | 4 | - | - | 3 | 1 | - | | 4 | - | - | | 2 | - | - |
|  | Contusion | - | - | - | 1 | - | - | | - | - | - | | - | - | - |
|  | Limb injury | - | - | - | 1 | - | - | | - | - | - | | - | - | - |
|  | Post lumbar puncture syndrome | 1 | - | - | 1 | - | - | | 2 | - | - | | 1 | - | - |
|  | Post procedural discomfort | - | - | - | - | - | - | | - | - | - | | 2 | - | - |
|  | Procedural pain | 3 | - | - | - | 1 | - | | 3 | - | - | | 1 | - | - |
| MUSCULOSKELETAL AND CONNECTIVE TISSUE DISORDERS | | - | - | - | 2 | - | - | | 1 | - | - | | - | - | - |
|  | Back pain | - | - | - | 1 | - | - | | - | - | - | | - | - | - |
|  | Myalgia | - | - | - | 1 | - | - | | 1 | - | - | | - | - | - |
| NERVOUS SYSTEM DISORDERS | | 4 | - | - | 2 | - | - | | 6 | - | - | | 1 | - | - |
|  | Dizziness | - | - | - | 1 | - | - | | - | - | - | | - | - | - |
|  | Dizziness postural | - | - | - | - | - | - | | 1 | - | - | | - | - | - |
|  | Headache | 4 | - | - | 2 | - | - | | 5 | - | - | | 1 | - | - |
|  | Somnolence | - | - | - | - | - | - | | 1 | - | - | | - | - | - |
| RENAL AND URINARY DISORDERS | | - | - | - | 1 | - | - | | - | - | - | | - | - | - |
|  | Pollakiuria | - | - | - | 1 | - | - | | - | - | - | | - | - | - |
| RESPIRATORY, THORACIC AND MEDIASTINAL DISORDERS | | 1 | - | - | 1 | - | - | | 1 | - | - | | - | - | - |
|  | Epistaxis | 1 | - | - | - | - | - | | - | - | - | | - | - | - |
|  | Nasal congestion | - | - | - | 1 | - | - | | - | - | - | | - | - | - |
|  | Rhinorrhoea | - | - | - | - | - | - | | 1 | - | - | | - | - | - |
| SKIN AND SUBCUTANEOUS TISSUE DISORDERS | | - | - | - | 4 | - | - | | - | - | - | | - | - | - |
|  | Dermatitis allergic | - | - | - | 1 | - | - | | - | - | - | | - | - | - |
|  | Dry skin | - | - | - | 1 | - | - | | - | - | - | | - | - | - |
|  | Pruritus | - | - | - | 1 | - | - | | - | - | - | | - | - | - |
|  | Sunburn | - | - | - | 1 | - | - | | - | - | - | | - | - | - |

The number of study participants with treatment emergent adverse events by treatment, system organ class, preferred term and severity. MOD = Moderate, SEV = severe

### MAD PK data:

**Extended Data Table 5 | Pharmacokinetic parameters in the multiple ascending dose study**

| Treatment | Parameter | Dose | n | Mean | Geo Mean | s.d. | CV (%) | Geo CV (%) | Median | Min | Max |
| --- | --- | --- | --- | --- | --- | --- | --- | --- | --- | --- | --- |
| 180 mg VES001 once daily | AUC0-12h (h*ng/mL) | 1 | 8 | 8937 | 8669 | 2350 | 26.3 | 26.9 | 8459 | 6312 | 11902 |
| 7 | 8 | 9050 | 8554 | 3060 | 33.8 | 38.2 | 9864 | 5303 | 12481 |
| AUC0-24h (h*ng/mL) | 1 | 8 | 9738 | 9462 | 2462 | 25.3 | 26.2 | 9429 | 6660 | 12594 |
| 7 | 8 | 10114 | 9675 | 3040 | 30.1 | 33.6 | 11283 | 6089 | 13719 |
| CL/F (L/h) | 7 | 8 | 22.37 | 21.04 | 8.488 | 37.9 | 38.2 | 18.3 | 14.4 | 33.9 |
| Cmax (ng/mL) | 1 | 8 | 2165 | 2110 | 556.3 | 25.7 | 24 | 2035 | 1490 | 3360 |
| 7 | 8 | 2124 | 2051 | 579.9 | 27.3 | 29.5 | 2130 | 1220 | 3080 |
| Ctrough (ng/mL) | 1 | 8 | 38.58 | 32.51 | 24.09 | 62.4 | 70.5 | 35.7 | 13 | 86.8 |
| 2 | 8 | 58.44 | 32.38 | 64.32 | 110 | 174.3 | 23.4 | 8.35 | 179 |
| 3 | 8 | 83.66 | 59.58 | 75.85 | 90.7 | 112.3 | 61.9 | 13.7 | 248 |
| 4 | 8 | 63.69 | 39.86 | 75.39 | 118.4 | 130.8 | 33.7 | 8.94 | 238 |
| 5 | 8 | 46.92 | 22.67 | 73.7 | 157.1 | 183.1 | 21.6 | 4.81 | 226 |
| 6 | 8 | 70.84 | 57.6 | 48.83 | 68.9 | 77.5 | 45.9 | 23.6 | 157 |
| 7 | 8 | 52.94 | 44.67 | 27.61 | 52.1 | 78.6 | 54.5 | 11.8 | 95.8 |
| PTR | 7 | 8 | 69.58 | 45.91 | 82.54 | 118.6 | 107.9 | 33.6 | 20 | 261 |
| Rac(AUC0-12h) | 7 | 8 | 1.003 | 0.9867 | 0.202 | 20.1 | 18.7 | 0.957 | 0.815 | 1.43 |
| Rac(AUC0-24h) | 7 | 8 | 1.032 | 1.022 | 0.163 | 15.8 | 14.6 | 1 | 0.877 | 1.4 |
| Rac(Cmax) | 7 | 8 | 1.01 | 0.9719 | 0.271 | 26.8 | 32.3 | 1.04 | 0.494 | 1.4 |
| Vz/F (L) | 7 | 8 | 255.3 | 212.5 | 189.3 | 74.1 | 68.5 | 195 | 83.3 | 692 |
| t1/2 (h) | 7 | 8 | 7.57 | 6.999 | 3.374 | 44.6 | 43.3 | 6.91 | 3.95 | 14.1 |
| Tmax (h) | 1 | 8 |  |  |  |  |  | 1.5 | 1.02 | 3 |
| 7 | 8 |  |  |  |  |  | 1.5 | 0.75 | 1.52 |
| 180 mg VES001 bidaily | AUC0-12h (h*ng/mL) | 1 | 8 | 6674 | 6535 | 1523 | 22.8 | 21.8 | 6289 | 5067 | 9560 |
| 13 | 8 | 8126 | 8066 | 1063 | 13.1 | 13 | 7756 | 7055 | 9599 |
| Cmax (ng/mL) | 1 | 8 | 1850 | 1810 | 411.8 | 22.3 | 22.8 | 1775 | 1300 | 2370 |
| 13 | 8 | 2406 | 2296 | 731.2 | 30.4 | 35.3 | 2435 | 1170 | 3490 |
| Ctrough (ng/mL) | 2 | 8 | 258.3 | 216.5 | 166.6 | 64.5 | 73.9 | 226 | 61 | 625 |
| 4 | 8 | 274.1 | 210.8 | 221.6 | 80.8 | 91.3 | 201 | 64.8 | 748 |
| 6 | 8 | 214.7 | 182.5 | 116.8 | 54.4 | 73.2 | 196 | 55.3 | 382 |
| 8 | 8 | 236.9 | 184.2 | 218.5 | 92.2 | 78 | 153 | 98 | 745 |
| 10 | 8 | 163.3 | 137.3 | 112.5 | 68.9 | 66.8 | 134 | 70.7 | 407 |
| 12 | 7 | 305.1 | 251.2 | 208.3 | 68.3 | 75 | 274 | 126 | 651 |
| 13 | 8 | 236 | 206.7 | 135.4 | 57.4 | 59.3 | 188 | 85 | 518 |
| 14 | 8 | 221 | 189.1 | 131.5 | 59.5 | 67.5 | 181 | 63.7 | 488 |
| PTR | 13 | 8 | 14.32 | 11.11 | 10.33 | 72.1 | 98.6 | 11 | 2.26 | 35.5 |
| Rac(AUC0-12h) | 13 | 8 | 1.262 | 1.234 | 0.256 | 20.3 | 23.7 | 1.3 | 0.741 | 1.53 |
| Rac(Cmax) | 13 | 8 | 1.326 | 1.269 | 0.413 | 31.2 | 33.5 | 1.33 | 0.688 | 2.12 |
| t1/2 (h) | 13 | 4 | 2.698 | 2.66 | 0.516 | 19.1 | 19.7 | 2.71 | 2.13 | 3.25 |
| Tmax (h) | 1 | 8 |  |  |  |  |  | 1.5 | 0.75 | 1.55 |
| 13 | 8 |  |  |  |  |  | 1.25 | 0.53 | 1.52 |
| 450 mg VES001 bidaily | AUC0-12h (h*ng/mL) | 1 | 8 | 17265 | 17005 | 3199 | 18.5 | 18.9 | 17187 | 12746 | 22524 |
| 13 | 8 | 20293 | 19577 | 5860 | 28.9 | 29.2 | 19071 | 12967 | 28729 |
| Cmax (ng/mL) | 1 | 8 | 4318 | 4123 | 1438 | 33.3 | 33.3 | 4015 | 2330 | 7270 |
| 13 | 8 | 4966 | 4655 | 1778 | 35.8 | 41.7 | 4795 | 2360 | 7590 |
| Ctrough (ng/mL) | 2 | 8 | 477.9 | 429.6 | 221.4 | 46.3 | 55.3 | 459 | 167 | 856 |
| 4 | 8 | 473.3 | 385 | 276.3 | 58.4 | 87.2 | 512 | 104 | 879 |
| 6 | 8 | 431.4 | 366.8 | 214.9 | 49.8 | 78.5 | 384 | 83.3 | 681 |
| 8 | 8 | 554.9 | 527 | 187.6 | 33.8 | 36.1 | 520 | 275 | 914 |
| 10 | 8 | 528.3 | 432.1 | 353.6 | 66.9 | 79.6 | 482 | 135 | 1250 |
| 12 | 8 | 473.1 | 387.2 | 243.8 | 51.5 | 96.3 | 461 | 62.5 | 790 |
| 13 | 8 | 356.4 | 321.9 | 156.6 | 43.9 | 53.9 | 388 | 144 | 522 |
| 14 | 8 | 457.8 | 388.7 | 264 | 57.7 | 70.5 | 460 | 151 | 909 |
| PTR | 13 | 8 | 19.06 | 14.46 | 15.46 | 81.1 | 96.4 | 17 | 4.6 | 52.7 |
| Rac(AUC0-12h) | 13 | 8 | 1.186 | 1.151 | 0.295 | 24.9 | 27.5 | 1.25 | 0.699 | 1.59 |
| Rac(Cmax) | 13 | 8 | 1.162 | 1.129 | 0.26 | 22.4 | 27.8 | 1.23 | 0.607 | 1.44 |
| t1/2 (h) | 13 | 4 | 2.547 | 2.439 | 0.863 | 33.9 | 35 | 2.44 | 1.64 | 3.67 |
| Tmax (h) | 1 | 8 |  |  |  |  |  | 1.51 | 1.5 | 8 |
| 13 | 8 |  |  |  |  |  | 1.51 | 1.48 | 6 |

Plasma PK parameters per treatment group. AUC = Area under the curve; CL = apparent clearance; Cmax = maximum concentration; Ctrough = trough concentration CV = coefficient of variation; F = bioavailability; Geo = geometric; PTR = peak-to-trough ratio; Rac = drug accumulation ratio; SD = standard deviation; Tmax = time at which maximum concentration is observed; T1/2 = half-life; Vz = apparent volume of distribution;

### MAD Progranulin data:

**Extended Data Table 6 | Plasma and cerebrospinal fluid progranulin data of the multiple ascending dose study**

| **Plasma Progranulin – Inferential statistics** | | | | | | | |
| --- | --- | --- | --- | --- | --- | --- | --- |
|  | | | **Back transformed** | | | | |
| **Effect/Contrast** | | **P-value** | **First LSM**  **of contrast** | **Second LSM**  **of contrast** | **Estimate of**  **the difference** | **Lower**  **95% CI** | **Upper 95% CI** |
| Baseline | | <0.0001 |  | | | | |
| Treatment | | <0.0001 |
| Time | | <0.0001 |
| Treatment by time | | <0.0001 |
| 1x180 mg VES001 vs. Placebo | | 0.1342 | 83208.26 | 76433.12 | 8.9% | -2.8% | 21.9% |
| 2x180 mg VES001 vs. Placebo | | <0.0001 | 99489.54 | 76433.12 | 30.2% | 15.9% | 46.2% |
| 2x450 mg VES001 vs. Placebo | | <0.0001 | 99319.51 | 76433.12 | 29.9% | 16.4% | 45.0% |
| **Plasma Progranulin – Descriptive statistics (Change from baseline)** | | | | | | | |
|  |  | **Back transformed** | | | | | |
| **Treatment** | **Time** | **LSM** | **Lower  %95 CI** | **Upper  %95 CI** | **LSM change from baseline** | **Lower 95% CI** | **Upper  %95 CI** |
| Placebo | Overall | 76433.12 | 70331.48 | 83064.11 | -4.0% | -11.7% | 4.3% |
| D1 30 min | 71769.46 | 64291.99 | 80116.59 | -9.9% | -19.3% | 0.6% |
| D1 45 min | 75416.86 | 67559.38 | 84188.20 | -5.3% | -15.1% | 5.7% |
| D1 1 h | 77591.15 | 69507.14 | 86615.38 | -2.5% | -12.7% | 8.8% |
| D1 1.5 h | 78781.72 | 70573.67 | 87944.42 | -1.1% | -11.4% | 10.5% |
| D1 3 h | 75608.13 | 67730.72 | 84401.72 | -5.0% | -14.9% | 6.0% |
| D1 6 h | 74173.35 | 66445.43 | 82800.07 | -6.8% | -16.5% | 4.0% |
| D1 8 h | 77181.38 | 69140.06 | 86157.94 | -3.1% | -13.2% | 8.2% |
| D1 12 h | 78775.45 | 70568.05 | 87937.41 | -1.1% | -11.4% | 10.4% |
| D1 24 h | 79814.32 | 71498.68 | 89097.11 | 0.2% | -10.2% | 11.9% |
| D3 | 80919.15 | 72488.40 | 90330.43 | 1.6% | -9.0% | 13.5% |
| D4 | 79315.58 | 71051.90 | 88540.37 | -0.4% | -10.8% | 11.2% |
| D5 | 77974.30 | 69850.36 | 87043.08 | -2.1% | -12.3% | 9.3% |
| D6 | 79526.31 | 71240.67 | 88775.60 | -0.1% | -10.5% | 11.5% |
| D7 Pre | 74683.01 | 66901.99 | 83369.01 | -6.2% | -16.0% | 4.7% |
| D7 30 min | 73566.47 | 65901.78 | 82122.61 | -7.6% | -17.2% | 3.1% |
| D7 45 min | 72110.53 | 64597.53 | 80497.33 | -9.4% | -18.9% | 1.1% |
| D7 1 h | 75047.63 | 67228.62 | 83776.03 | -5.7% | -15.6% | 5.2% |
| D7 1.5 h | 78303.91 | 70145.63 | 87411.03 | -1.7% | -11.9% | 9.8% |
| D7 3 h | 74136.64 | 66412.54 | 82759.08 | -6.9% | -16.6% | 3.9% |
| D7 6 h | 77325.33 | 69269.01 | 86318.64 | -2.9% | -13.0% | 8.4% |
| D7 8 h | 73864.56 | 66168.81 | 82455.36 | -7.2% | -16.9% | 3.6% |
| D7 12 h | 72442.52 | 64894.93 | 80867.93 | -9.0% | -18.5% | 1.6% |
| D8 | 75311.75 | 67465.22 | 84070.87 | -5.4% | -15.3% | 5.6% |
| D8 12 h | 78604.18 | 70414.62 | 87746.22 | -1.3% | -11.6% | 10.2% |
| D9 | 79727.43 | 71420.84 | 89000.11 | 0.1% | -10.3% | 11.8% |
| 1x180 mg VES001 | Overall | 83208.26 | 76852.39 | 90089.77 | 4.5% | -3.5% | 13.2% |
| D1 30 min | 72486.28 | 65331.05 | 80425.17 | -9.0% | -17.9% | 1.0% |
| D1 45 min | 70029.55 | 63309.53 | 77462.88 | -12.0% | -20.5% | -2.7% |
| D1 1 h | 73268.20 | 66237.39 | 81045.30 | -8.0% | -16.8% | 1.8% |
| D1 1.5 h | 76343.81 | 69017.87 | 84447.37 | -4.1% | -13.3% | 6.1% |
| D1 3 h | 78131.80 | 70634.29 | 86425.15 | -1.9% | -11.3% | 8.5% |
| D1 6 h | 82741.60 | 74801.73 | 91524.26 | 3.9% | -6.1% | 15.0% |
| D1 8 h | 88533.14 | 80037.51 | 97930.55 | 11.2% | 0.5% | 23.0% |
| D1 12 h | 80266.49 | 72564.13 | 88786.42 | 0.8% | -8.9% | 11.5% |
| D1 24 h | 75300.65 | 68074.81 | 83293.48 | -5.4% | -14.5% | 4.6% |
| D3 | 80464.69 | 72743.31 | 89005.67 | 1.1% | -8.6% | 11.8% |
| D4 | 85614.21 | 77398.68 | 94701.78 | 7.5% | -2.8% | 18.9% |
| D5 | 83845.09 | 75799.32 | 92744.87 | 5.3% | -4.8% | 16.5% |
| D6 | 85148.95 | 76978.07 | 94187.13 | 6.9% | -3.3% | 18.3% |
| D7 Pre | 82433.90 | 74523.56 | 91183.90 | 3.5% | -6.4% | 14.5% |
| D7 30 min | 85296.39 | 77111.36 | 94350.23 | 7.1% | -3.1% | 18.5% |
| D7 45 min | 84841.12 | 76699.78 | 93846.63 | 6.6% | -3.7% | 17.9% |
| D7 1 h | 87582.76 | 79178.33 | 96879.29 | 10.0% | -0.6% | 21.7% |
| D7 1.5 h | 91202.26 | 82450.50 | 100883.0 | 14.5% | 3.6% | 26.7% |
| D7 3 h | 88703.93 | 80191.91 | 98119.46 | 11.4% | 0.7% | 23.2% |
| D7 6 h | 95483.65 | 86321.05 | 105618.8 | 19.9% | 8.4% | 32.7% |
| D7 8 h | 96860.51 | 87565.79 | 107141.8 | 21.7% | 10.0% | 34.6% |
| D7 12 h | 92116.34 | 83276.87 | 101894.1 | 15.7% | 4.6% | 28.0% |
| D8 | 87607.66 | 79200.84 | 96906.83 | 10.0% | -0.5% | 21.7% |
| D8 12 h | 81845.07 | 73991.23 | 90532.57 | 2.8% | -7.1% | 13.7% |
| D9 | 80942.78 | 73175.52 | 89534.50 | 1.7% | -8.1% | 12.5% |
| 2x180 mg VES001 | Overall | 99489.54 | 92016.90 | 107569.0 | 25.0% | 15.6% | 35.1% |
| D1 30 min | 83801.12 | 76010.29 | 92390.50 | 5.3% | -4.5% | 16.0% |
| D1 45 min | 83776.82 | 75988.24 | 92363.70 | 5.2% | -4.6% | 16.0% |
| D1 1 h | 83306.76 | 75561.88 | 91845.46 | 4.6% | -5.1% | 15.4% |
| D1 1.5 h | 84403.22 | 76556.41 | 93054.31 | 6.0% | -3.8% | 16.9% |
| D1 3 h | 86829.71 | 78757.31 | 95729.50 | 9.1% | -1.1% | 20.2% |
| D1 6 h | 90807.41 | 82365.21 | 100114.9 | 14.1% | 3.4% | 25.7% |
| D1 8 h | 92854.14 | 84221.66 | 102371.4 | 16.6% | 5.8% | 28.6% |
| D1 12 h | 94582.40 | 85789.25 | 104276.8 | 18.8% | 7.7% | 31.0% |
| D1 24 h | 101088.7 | 91690.71 | 111450.0 | 27.0% | 15.2% | 40.0% |
| D3 | 105744.8 | 95913.87 | 116583.3 | 32.8% | 20.5% | 46.4% |
| D4 | 106012.5 | 96156.76 | 116878.5 | 33.1% | 20.8% | 46.8% |
| D5 | 105881.6 | 96038.00 | 116734.2 | 33.0% | 20.6% | 46.6% |
| D6 | 107426.1 | 97438.93 | 118437.0 | 34.9% | 22.4% | 48.8% |
| D7 Pre | 104894.8 | 95142.90 | 115646.2 | 31.7% | 19.5% | 45.2% |
| D7 30 min | 105425.1 | 95623.94 | 116230.9 | 32.4% | 20.1% | 46.0% |
| D7 45 min | 106051.1 | 96191.75 | 116921.1 | 33.2% | 20.8% | 46.9% |
| D7 1 h | 106340.5 | 96454.19 | 117240.1 | 33.6% | 21.1% | 47.3% |
| D7 1.5 h | 113848.2 | 103263.9 | 125517.3 | 43.0% | 29.7% | 57.6% |
| D7 3 h | 104763.0 | 95023.41 | 115500.9 | 31.6% | 19.3% | 45.1% |
| D7 6 h | 112628.9 | 102158.0 | 124173.1 | 41.5% | 28.3% | 56.0% |
| D7 8 h | 109091.3 | 98949.33 | 120272.9 | 37.0% | 24.3% | 51.1% |
| D7 12 h | 106998.0 | 97050.56 | 117964.9 | 34.4% | 21.9% | 48.2% |
| D8 | 112120.0 | 101696.4 | 123612.0 | 40.8% | 27.7% | 55.3% |
| D8 12 h | 98449.93 | 89081.16 | 108804.0 | 23.7% | 11.9% | 36.7% |
| D9 | 92514.88 | 83710.90 | 102244.8 | 16.2% | 5.1% | 28.4% |
| 2x450 mg VES001 | Overall | 99319.51 | 92429.23 | 106723.4 | 24.7% | 16.1% | 34.0% |
| D1 30 min | 74713.12 | 67930.44 | 82173.04 | -6.2% | -14.7% | 3.2% |
| D1 45 min | 77309.44 | 70291.05 | 85028.59 | -2.9% | -11.7% | 6.8% |
| D1 1 h | 74005.87 | 67287.40 | 81395.18 | -7.1% | -15.5% | 2.2% |
| D1 1.5 h | 76969.31 | 69981.80 | 84654.50 | -3.3% | -12.1% | 6.3% |
| D1 3 h | 79056.93 | 71879.91 | 86950.57 | -0.7% | -9.7% | 9.2% |
| D1 6 h | 84111.45 | 76475.56 | 92509.77 | 5.6% | -3.9% | 16.2% |
| D1 8 h | 86819.52 | 78937.78 | 95488.23 | 9.0% | -0.9% | 19.9% |
| D1 12 h | 89332.94 | 81223.02 | 98252.61 | 12.2% | 2.0% | 23.4% |
| D1 24 h | 100439.8 | 91321.60 | 110468.5 | 26.2% | 14.7% | 38.7% |
| D3 | 108006.4 | 98201.23 | 118790.5 | 35.7% | 23.3% | 49.2% |
| D4 | 115743.1 | 105235.6 | 127299.7 | 45.4% | 32.2% | 59.9% |
| D5 | 109130.3 | 99223.09 | 120026.7 | 37.1% | 24.6% | 50.8% |
| D6 | 115040.3 | 104596.6 | 126526.8 | 44.5% | 31.4% | 58.9% |
| D7 Pre | 112123.0 | 101944.1 | 123318.2 | 40.8% | 28.0% | 54.9% |
| D7 30 min | 110271.1 | 100260.4 | 121281.4 | 38.5% | 25.9% | 52.3% |
| D7 45 min | 117413.4 | 106754.3 | 129136.8 | 47.5% | 34.1% | 62.2% |
| D7 1 h | 113160.1 | 102887.1 | 124458.8 | 42.1% | 29.2% | 56.3% |
| D7 1.5 h | 111862.3 | 101707.1 | 123031.5 | 40.5% | 27.7% | 54.5% |
| D7 3 h | 115156.4 | 104702.2 | 126654.5 | 44.6% | 31.5% | 59.1% |
| D7 6 h | 117313.7 | 106663.6 | 129027.2 | 47.3% | 34.0% | 62.1% |
| D7 8 h | 111737.2 | 101593.4 | 122893.9 | 40.3% | 27.6% | 54.4% |
| D7 12 h | 108627.9 | 98766.30 | 119474.1 | 36.4% | 24.0% | 50.1% |
| D8 | 116768.9 | 106168.3 | 128428.0 | 46.7% | 33.3% | 61.3% |
| D8 12 h | 97506.47 | 88654.54 | 107242.2 | 22.5% | 11.3% | 34.7% |
| D9 | 91874.03 | 83533.42 | 101047.4 | 15.4% | 4.9% | 26.9% |
| **Cerebrospinal fluid progranulin – Inferential statistics** | | | | | | | |
|  | |  | **Back transformed** | | | | |
| **Effect/Contrast** | | **P-value** | **First LSM**  **of contrast** | **Second LSM**  **of contrast** | **Estimate of**  **the difference** | **Lower**  **95% CI** | **Upper 95% CI** |
| Baseline | | <0.0001 |  |  |  |  |  |
| Treatment | | <0.01 |  |  |  |  |  |
| 1x180 mg VES001 vs. Placebo | | 0.1853 | 2329.901 | 2187.403 | 6.5% | -3.2% | 17.2% |
| 2x180 mg VES001 vs. Placebo | | <0.01 | 2564.621 | 2187.403 | 17.2% | 7.0% | 28.5% |
| 2x450 mg VES001 vs. Placebo | | <0.01 | 2574.140 | 2187.403 | 17.7% | 7.4% | 29.0% |
| **Cerebrospinal fluid progranulin – Descriptive statistics (Change from baseline)** | | | | | | | |
|  | | **Back transformed** | | | | | |
| **Treatment** | | **LSM** | **Lower** | **Upper** | **LSM change from baseline** | **Lower**  **95% CI** | **Upper  95% CI** |
| Placebo | | 2187.403 | 2045.483 | 2339.170 | 0.0 | -6.5% | 7.0% |
| 1x180 mg VES001 | | 2329.901 | 2176.235 | 2494.417 | 6.6 | -0.5% | 14.1% |
| 2x180 mg VES001 | | 2564.621 | 2410.926 | 2728.113 | 17.3 | 10.3% | 24.8% |
| 2x450 mg VES001 | | 2574.140 | 2418.717 | 2739.549 | 17.7 | 10.6% | 25.3% |

CI = Confidence interval; CSF = cerebrospinal fluid h = hours; LSM = Least square means; MAD = multiple-ascending dose; PGRN = Progranulin; Pre = Pre-dose
